# Supplementary material for: Self-assembly of semiaromatic poly(amic acid) into flower-like microparticles via one-step precipitation polymerization
Source: Royal Society of Chemistry journal article supplement (doi:10.1039/d4lp00327f), 2025-01-01
Supplement: d4lp00327f1.pdf [file d4lp00327f1.pdf]

# **Self-assembly of semiaromatic poly(amic acid) into flower-like microparticles via one-step precipitation polymerization**

*Yuqian Chen<sup>a</sup>, Ryohei Kikuchi<sup>b</sup>, Kan Hatakeyama-Sato<sup>a</sup>,*

*Yuta Nabae<sup>a,\*</sup>, Teruaki Hayakawa<sup>a,\*</sup>*

a. Department of Materials Science and Engineering, School of Materials and Chemical Technology, Institute of Science Tokyo, 2-12-1 S8-36 Ookayama Meguro-ku, Tokyo 152-8552, Japan

b. Materials Analysis Division, Core Facility Center, Research Infrastructure Management Center, Institute of Science Tokyo, 2-12-1 S7-26, Ookayama, Meguro-ku, Tokyo 152-8552, Japan.

**Table S1.** Result of solubility test for DA-6 (5 mg/ mL).

| Solvent             | Solubility |              |                   |
|---------------------|------------|--------------|-------------------|
|                     | r.t.       | Upon heating | Recovered to r.t. |
| EtOH                | -          | -            |                   |
| THF                 | -          | +            | +                 |
| Ether               | -          | -            |                   |
| DMF                 | +          |              |                   |
| DMSO                | +          |              |                   |
| DMAc                | +          |              |                   |
| Acetone             | -          | -            |                   |
| Hexane              | -          | -            |                   |
| Toluene             | -          | -            |                   |
| Ethyl acetate       | -          | -            |                   |
| Chloroform          | -          | -            |                   |
| Dichloromethane     | -          | +            | -                 |
| Chlorobenzene       | -          | -            |                   |
| Pyridine            | +          |              |                   |
| NMP                 | +          |              |                   |
| Acetonitrile        | -          | -            |                   |
| Methyl ethyl ketone | -          | -            |                   |
| Acetophenone        | -          | -            |                   |
| Cyclohexanone       | -          | +            | +                 |

-:insoluble, +:soluble, -/recovered to r.t.: precipitate if recovered to r.t., +/-recovered to r.t.: do not precipitate if recovered to r.t.

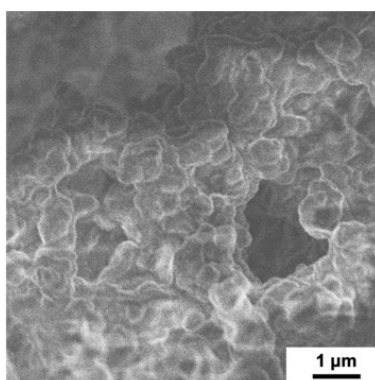

**Figure S1.** FE-SEM images of DA-6/PMDA prepared from THF.

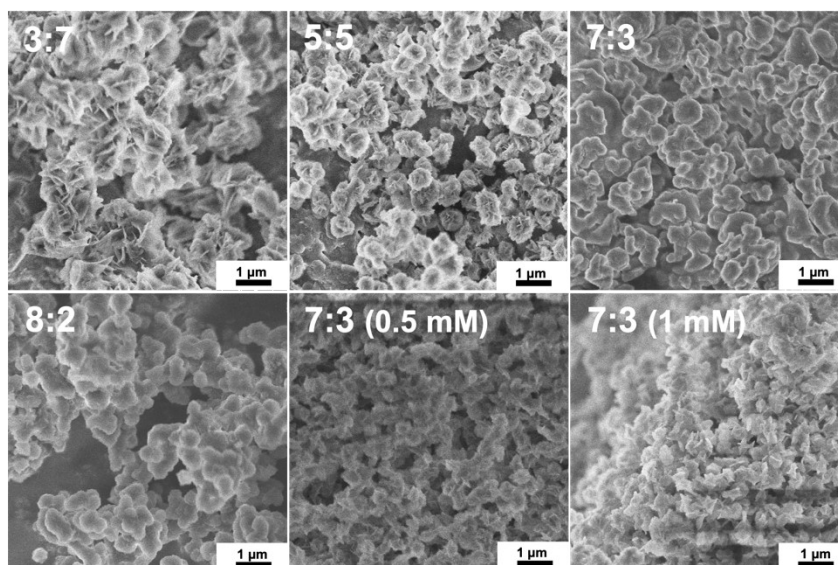

**Figure S2.** FE-SEM images of DA-6/PMDA prepared in the mixed solvents of cyc/tol = 3:7, 5:5, 7:3, 8:2 and the influence of monomer concentration was studied in the condition of cyc/tol = 7:3.

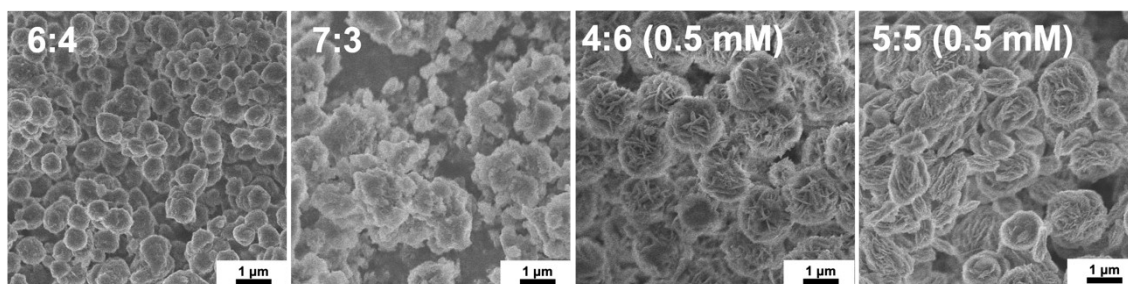

**Figure S3.** FE-SEM images of DA-6/PMDA prepared in the mixed solvents of cyc/ace = 6:4, 7:3, and in an elevated concentration of 0.5 mM/ 100 mL in cyc/ace = 4:6 and 5:5.

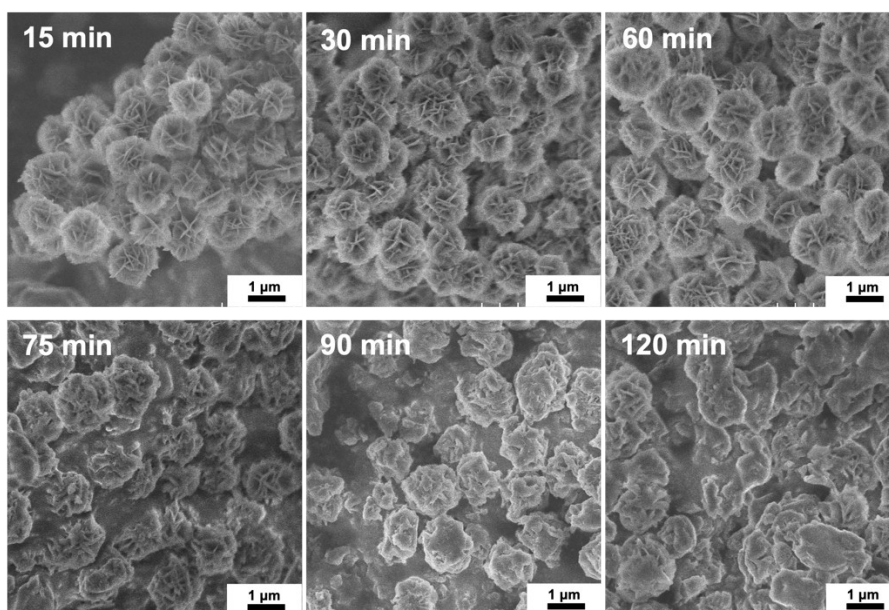

**Figure S4.** The morphology evolution of FLPs was studied by observing particle morphology at 5-minute intervals up to 120 min in the cyc/ace = 4:6. FLPs were visible from the beginning, but their morphology became increasingly blurred after 60 minutes of reaction time.

**Table S2.** Inherent viscosities of PAA particles prepared in the mixed solvent of cyc/tol = 7:3 and cyc/ace = 8:2, and PAA of the same chemical composition prepared from solution polymerization

|               | $\eta_{inh}^*$ [dL/g] |
|---------------|-----------------------|
| Cyc/tol = 7:3 | 0.14                  |
| Cyc/ace = 8:2 | 0.26                  |
| DA-6/PMDA PAA | 1.11                  |

\*The inherent viscosities ( $\eta_{inh}$ ) of the PAAs were measured in NMP at a solid content of 0.5 dL/g at 30 °C using an Ostwald viscometer

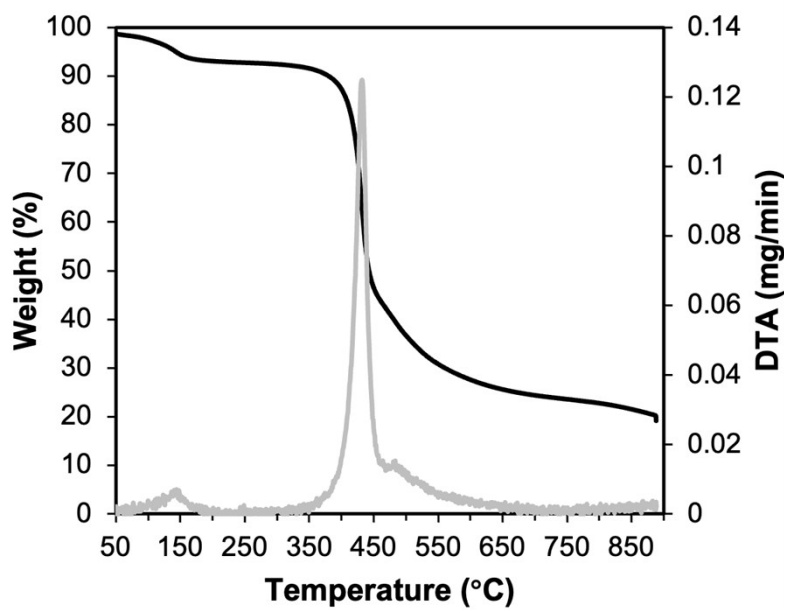

**Figure S5.** TGA/DTA of PAA FLPs.

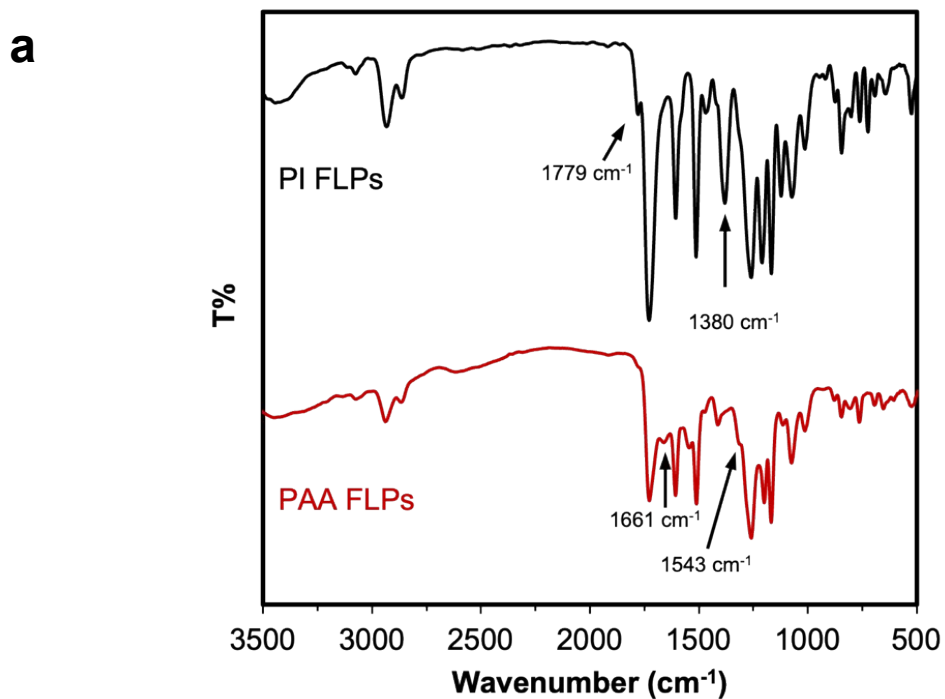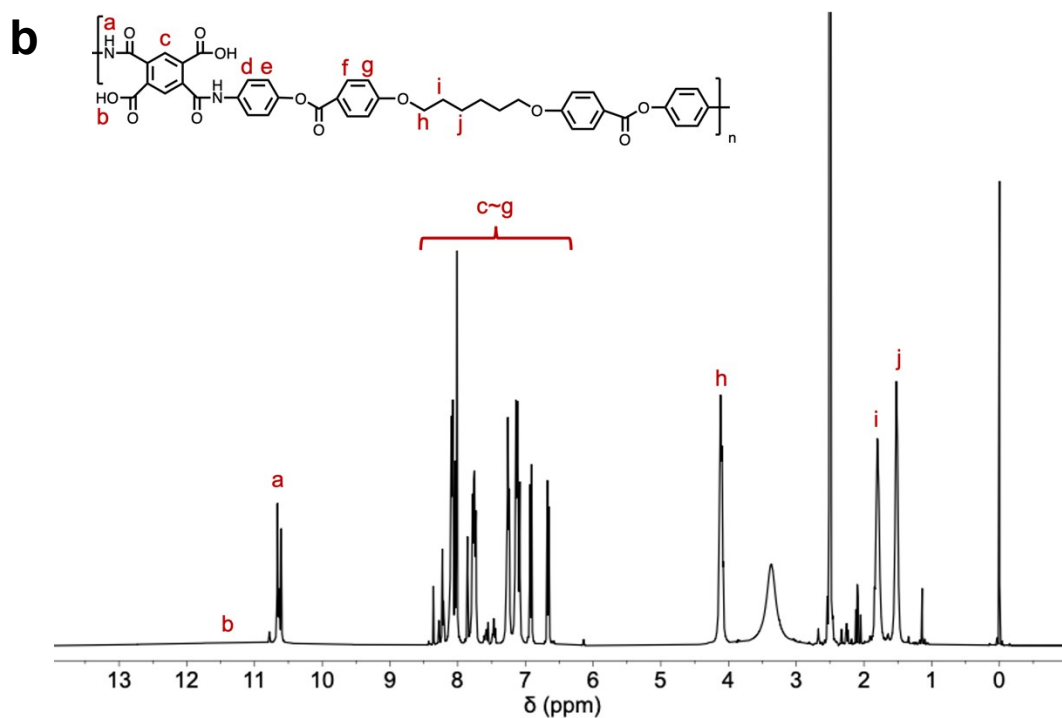

**Figure S6.** (a) FT-IR spectra of PAA FLPs prepared in cyc/ace = 5:5 as an example and PI. (b)  $^1\text{H}$  NMR (400 MHz) spectra of DA-6/PMDA PAA particles in  $\text{DMSO-}D_6$  prepared in cyc/ace = 2:8 as the representative. The carboxyl proton was not obvious, which could be attributed to COOH-NH- interactions and 3D conformation and concentration of PAA.<sup>1</sup>

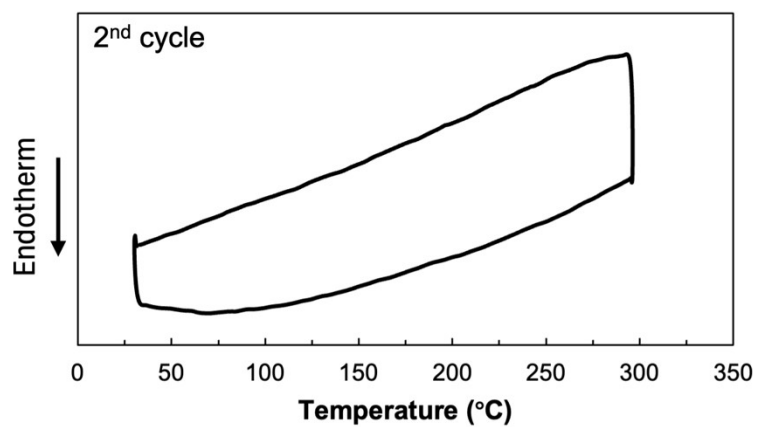

**Figure S7.** DSC thermogram of PI FLPs prepared in cyc/ace = 2:8 shows no phase transition behavior between 30~300 °C.

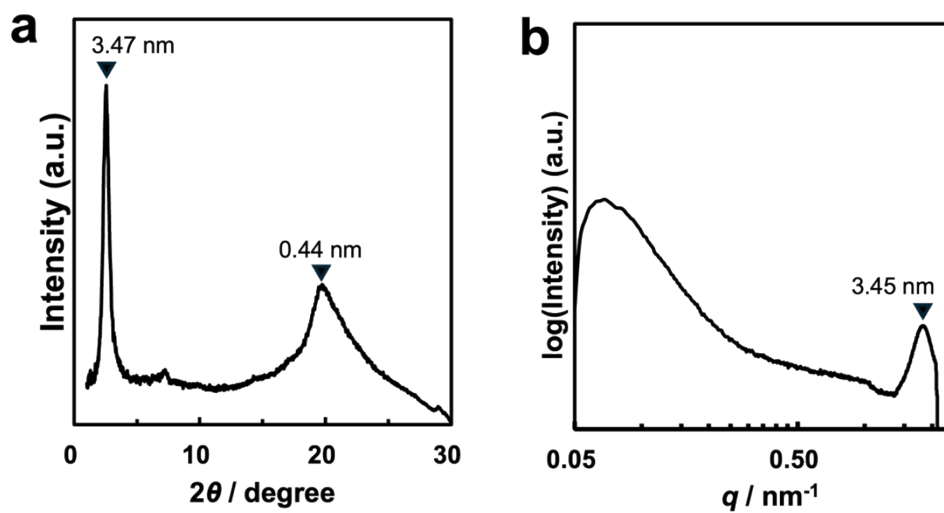

**Figure S8.** WAXD profile (a) and SAXS profile (b) of DA-6/PMDA bulk PI film.

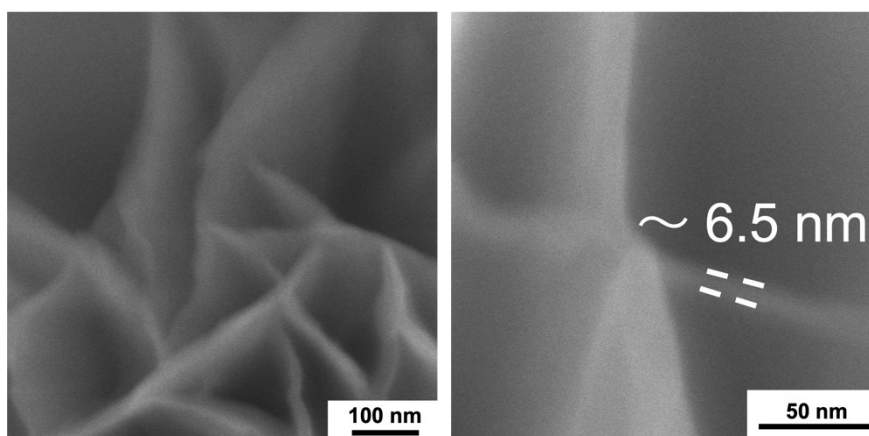

**Figure S9.** FE-SEM images of the layer thickness of the flower-like particles.

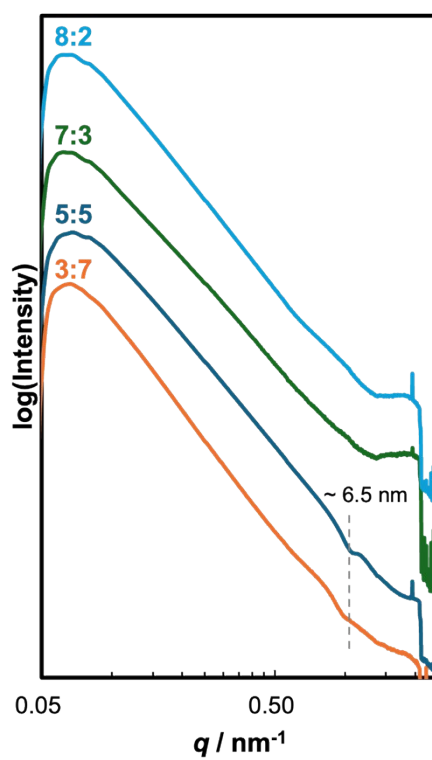

**Figure S10.** SAXS profile of DA-6/PMDA particles prepared in cyc/tol. Particles with fractal surface in cyc/tol = 3:7 and 5:5 exhibited oscillatory valley around 6.5 nm.



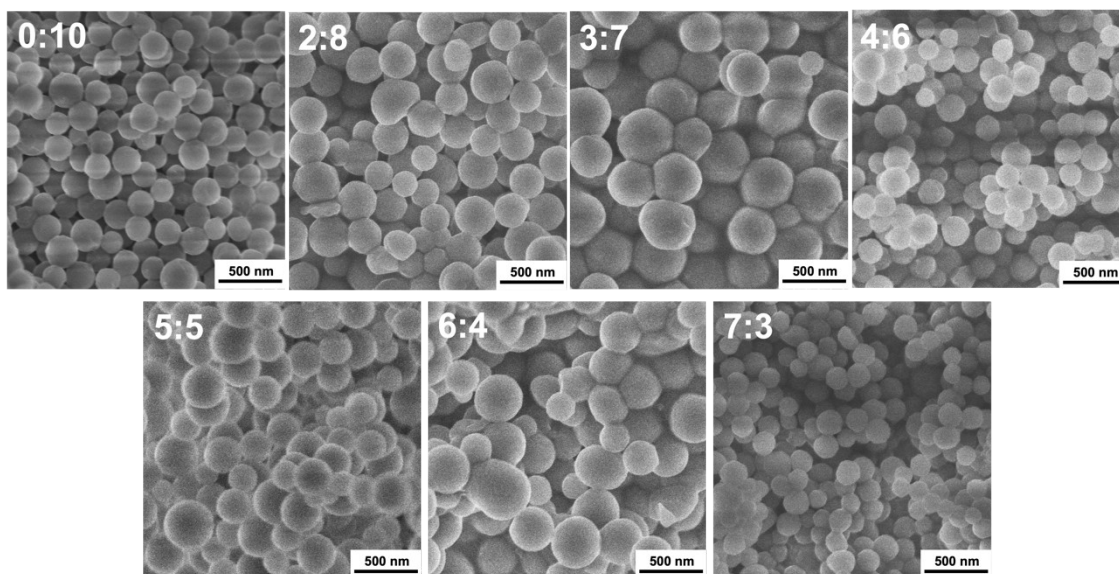

**Figure S11.** ODA/PMDA prepared in cyc/ace as the comparison.

**Table S3.** Half wave potential ( $E_{1/2}$ ) and the on-set potential ( $E_{0.1 \text{ mA}}$ ) defined as the potential at which a current density of 0.1 mA is achieved, are determined by the RRDE voltammogram of carbon flowers, amorphous carbon and KB.

|                                  | <b>Carbon flowers</b> | <b>Amorphous carbon</b> | <b>KB</b> |
|----------------------------------|-----------------------|-------------------------|-----------|
| $E_{1/2}$ (V vs. RHE)            | 0.25                  | 0.20                    | 0.08      |
| $E_{0.1 \text{ mA}}$ (V vs. RHE) | 0.46                  | 0.37                    | 0.18      |

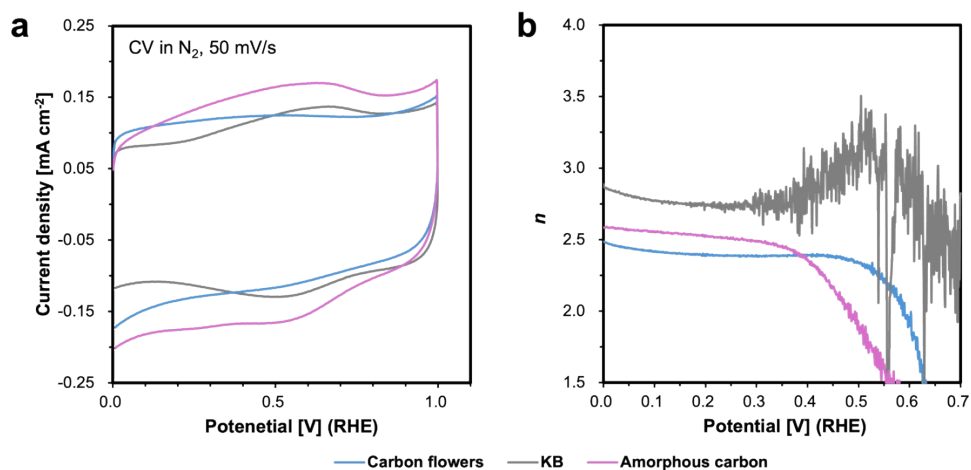

**Figure S12.** CV curves in  $N_2$  (a) and electron transfer number (b) of carbon flowers, amorphous carbon, and KB.

**Reference:**

1 İ. Yazgan, *Polym. Bull.*, 2020, **77**, 1191–1203.
